# Supplementary material
Source: MDPI journal article supplement (https://www.mdpi.com/2673-3978/3/4/29)
Supplement: s1 [file s1]

## Supporting Information

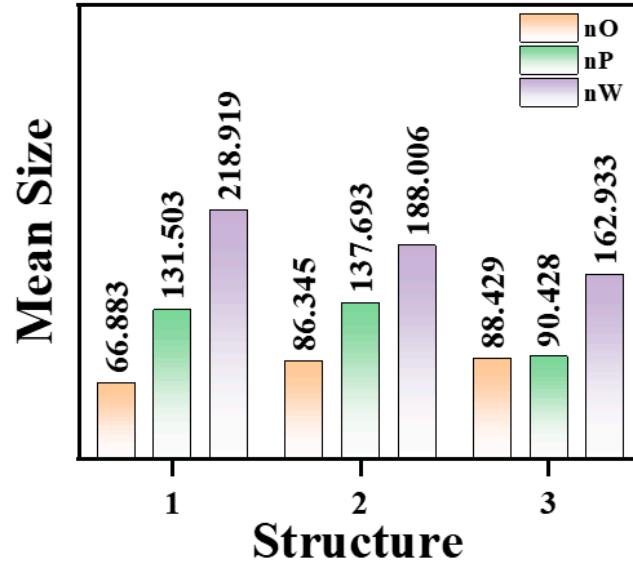

**Figure S1:** The particle size distribution data for nO, nP, and nW.

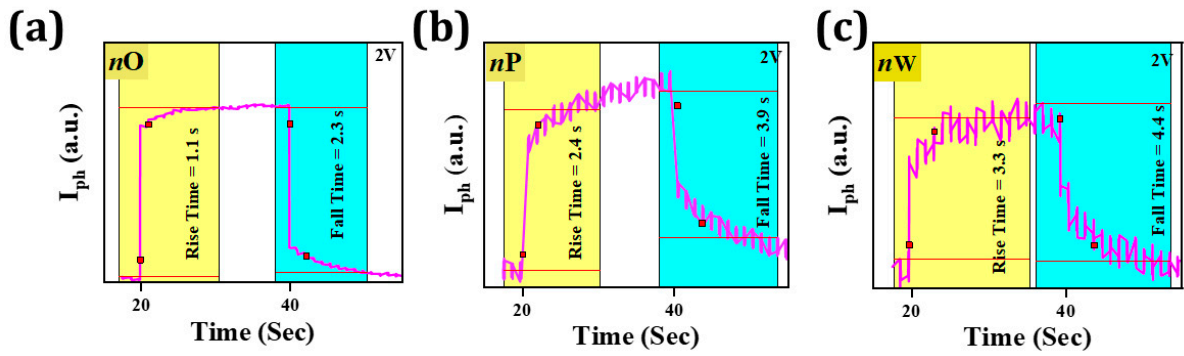

**Figure S2:** A single magnified  $I$ – $T$  curve at 2V bias condition to calculate the rise/decay time for (a) nO, (b) nP, and (c) nW.
